# Supplementary material
Source: publisher site journal article supplement (https://www.dovepress.com/get_supplementary_file.php?f=343286.docx)
Supplement: Supplementary file 1 [file get_supplementary_file.php]

**Supporting information**

**Associations between total sleep duration and cognitive function among middle-aged and older Chinese: Does midday napping affect on it?**

**Contents**

**Table S1.** Associations between midday napping and cognitive function among the participants

**Table S2.** Associations between total sleep duration and cognitive function among the participants without dementia

**Table S3.** Associations between midday napping and cognitive function in different subgroups stratified by total sleep duration among the participants without dementia

**Figure S1**. Mean scores of cognitive functions in participants with different total sleep duration stratified by family lifestyles and depressive symptoms.

**Figure S2.** Association between total sleep duration and cognition function score stratified by current smoking and current drinking.

**Table S1.** Associations between midday napping and cognitive function among the participants

|  | **Midday Napping** | | | |
| --- | --- | --- | --- | --- |
| Non-nappers | Short nappers | Moderate nappers | Extended nappers |
| Model Ⅰ | -1.420 (-1.711, -1.130) *** | Ref | -0.309 (-0.612, -0.007) * | -1.149 (-1.489, -0.808) *** |
| Model Ⅱ | -0.758 (-0.991, -0.526) *** | Ref | -0.240 (-0.481, 0.002) | -0.736 (-1.009, -0.463) *** |
| Model Ⅲ | -0.741 (-0.972, -0.510) *** | Ref | -0.243 (-0.483, 0.003) | -0.748 (-1.019, -0.478) *** |

Model Ⅰ: Crude model

Model Ⅱ: Adjusted for gender, age, BMI, WC, residential locations, marital status, education level, current smoking, current drinking, social activity

Model Ⅲ: Multivariable model with additional adjusted for self-reported health status, hypertension, diabetes, depressive symptoms based on Model Ⅱ

*P < 0.05, ***P < 0.001.

**Table S2.** Associations between total sleep duration and cognitive function among the participants without dementia

|  | **Total sleep duration （hour）** | | | | | **P for trend**  (5 to 7) | **P for trend**  (7 to 9) |
| --- | --- | --- | --- | --- | --- | --- | --- |
| **≤ 5** | **6** | **7** | **8** | **≥9** |
| Model Ⅰ | -2.313 (-2.590, -2.036)*** | -0.391 (-0.695, -0.087)* | Ref | -0.473 (-0.758, -0.187)*** | -1.134 (-1.401, -0.867)*** | <0.001 | <0.001 |
| Model Ⅱ | -1.154 (-1.379, -0.930)*** | -0.333 (-0.576, -0.089)** | Ref | -0.405 (-0.634, -0.177)*** | -0.620 (-0.834, -0.406)*** | <0.001 | <0.001 |
| Model Ⅲ | -0.991 (-1.216, -0.765)*** | -0.295 (-0.537, -0.052)* | Ref | -0.433 (-0.661, -0.206)*** | -0.670 (-0.883, -0.457)*** | <0.001 | <0.001 |

Model Ⅰ: Crude model

Model Ⅱ: Adjusted for gender, age, BMI, WC, residential locations, marital status, education level, current smoking, current drinking, social activity

Model Ⅲ: multivariable model with additional adjusted for self-reported health status, hypertension, diabetes, depressive symptoms based on Model Ⅱ

*P < 0.05, **P < 0.01, ***P < 0.001.

**Table S3.** Associations between midday napping and cognitive function in different subgroups stratified by total sleep duration among the participants without dementia †

| **Total sleep duration**  **(hour)** | **Midday napping duration** | | | |
| --- | --- | --- | --- | --- |
| Non-nappers | Short nappers | Moderate nappers | Extended nappers |
| Model Ⅰ |  |  |  |  |
| ≤5 | -0.860 (-1.481, -0.240) ** |  | -0.764 (-1.515, -0.013) * | -2.082 (-3.343, -0.822) *** |
| 6 | -1.208 (-1.865, -0.550) *** |  | -0.409 (-1.140, 0.321) | -1.932 (-2.969, -0.895) *** |
| 7 | -0.896 (-1.489, -0.303) ** |  | -0.103 (-0.704, 0.498) | -1.781 (-2.575, -0.987) *** |
| 8 | -2.138 (-2.795, -1.481) *** |  | -0.737 (-1.418, -0.057) * | -1.770 (-2.544, -0.995) *** |
| ≥9 | -1.798 (-2.526, -1.071) *** |  | -0.056 (-0.692, 0.580) | -0.496 (-1.143, 0.151) |
| Model Ⅱ |  |  |  |  |
| ≤5 | -0.695 (-1.178, -0.213) ** |  | -0.675 (-1.258, -0.092) * | -1.775 (-2.750, -0.800) *** |
| 6 | -0.783 (-1.342, -0.223) ** |  | -0.315 (-0.937, 0.307) | -0.988 (-1.868, -0.108) * |
| 7 | -0.642 (-1.136, -0.148) * |  | -0.016 (-0.518, 0.486) | -0.978 (-1.639, -0.317) ** |
| 8 | -0.788 (-1.323, -0.253) ** |  | -0.309 (-0.859, 0.240) | -0.775 (-1.407, -0.143) * |
| ≥9 | -0.665 (-1.255, -0.076) * |  | -0.048 (-0.561, 0.465) | -0.380 (-0.902, 0.142) |
| Model Ⅲ |  |  |  |  |
| ≤5 | -0.698 (-1.179, -0.218) ** | Ref | -0.668 (-1.249, -0.087) * | -1.762 (-2.736, -0.789) *** |
| 6 | -0.793 (-1.352, -0.234) ** | Ref | -0.236 (-0.858, 0.387) | -0.904 (-1.783, -0.024) * |
| 7 | -0.723 (-1.214, -0.232) ** | Ref | -0.071 (-0.570, 0.427) | -0.937 (-1.593, -0.282) ** |
| 8 | -0.753 (-1.283, -0.222) ** | Ref | -0.243 (-.789, 0.302) | -0.689 (-1.316, -0.062) * |
| ≥9 | -0.674 (-1.260, -0.087) * | Ref | -0.007 (-0.517, 0.503) | -0.329 (-.849, 0.191) |

†Model adjusted for gender, age, BMI, WC, residential locations, marital status, education level, current smoking, current drinking, social activity, self-rated health, hypertension, diabetes, depressive symptoms

*P < 0.05, **P < 0.01, ***P < 0.001.


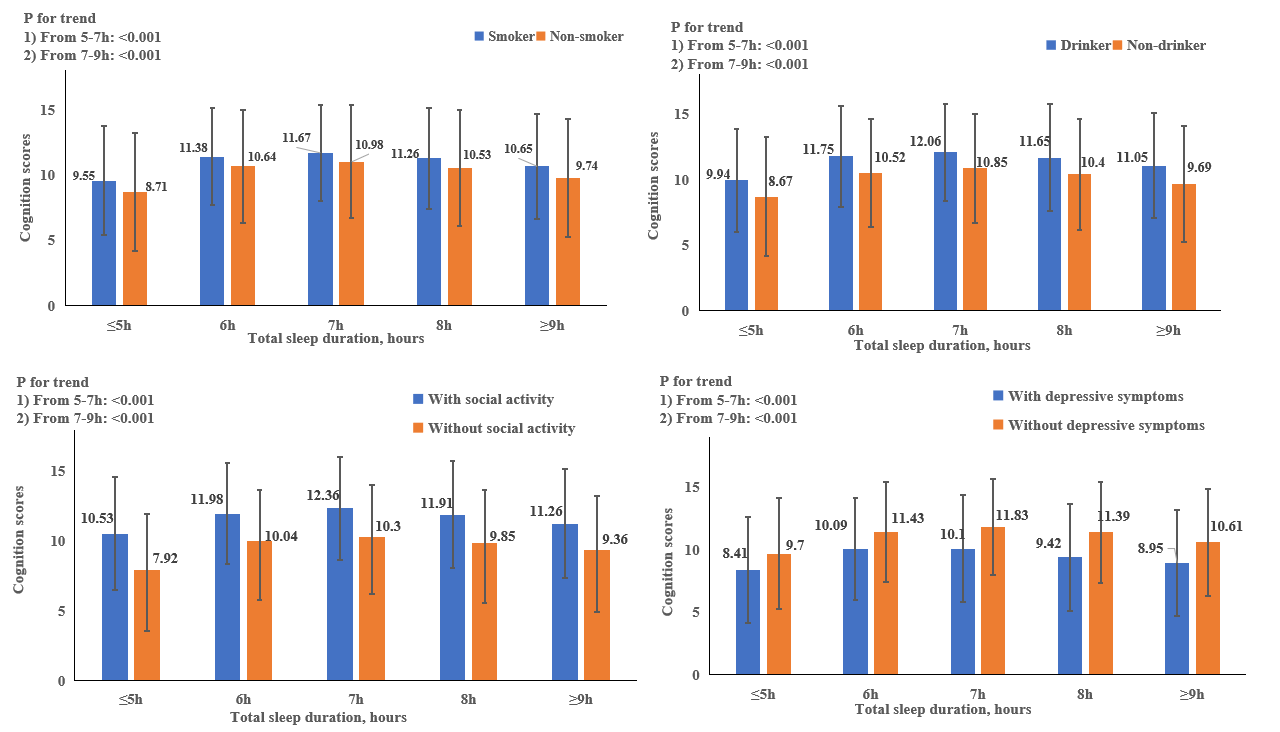


**Figure S1.** Mean scores of cognitive functions in participants with different total sleep duration stratified by family lifestyles and depressive symptoms.


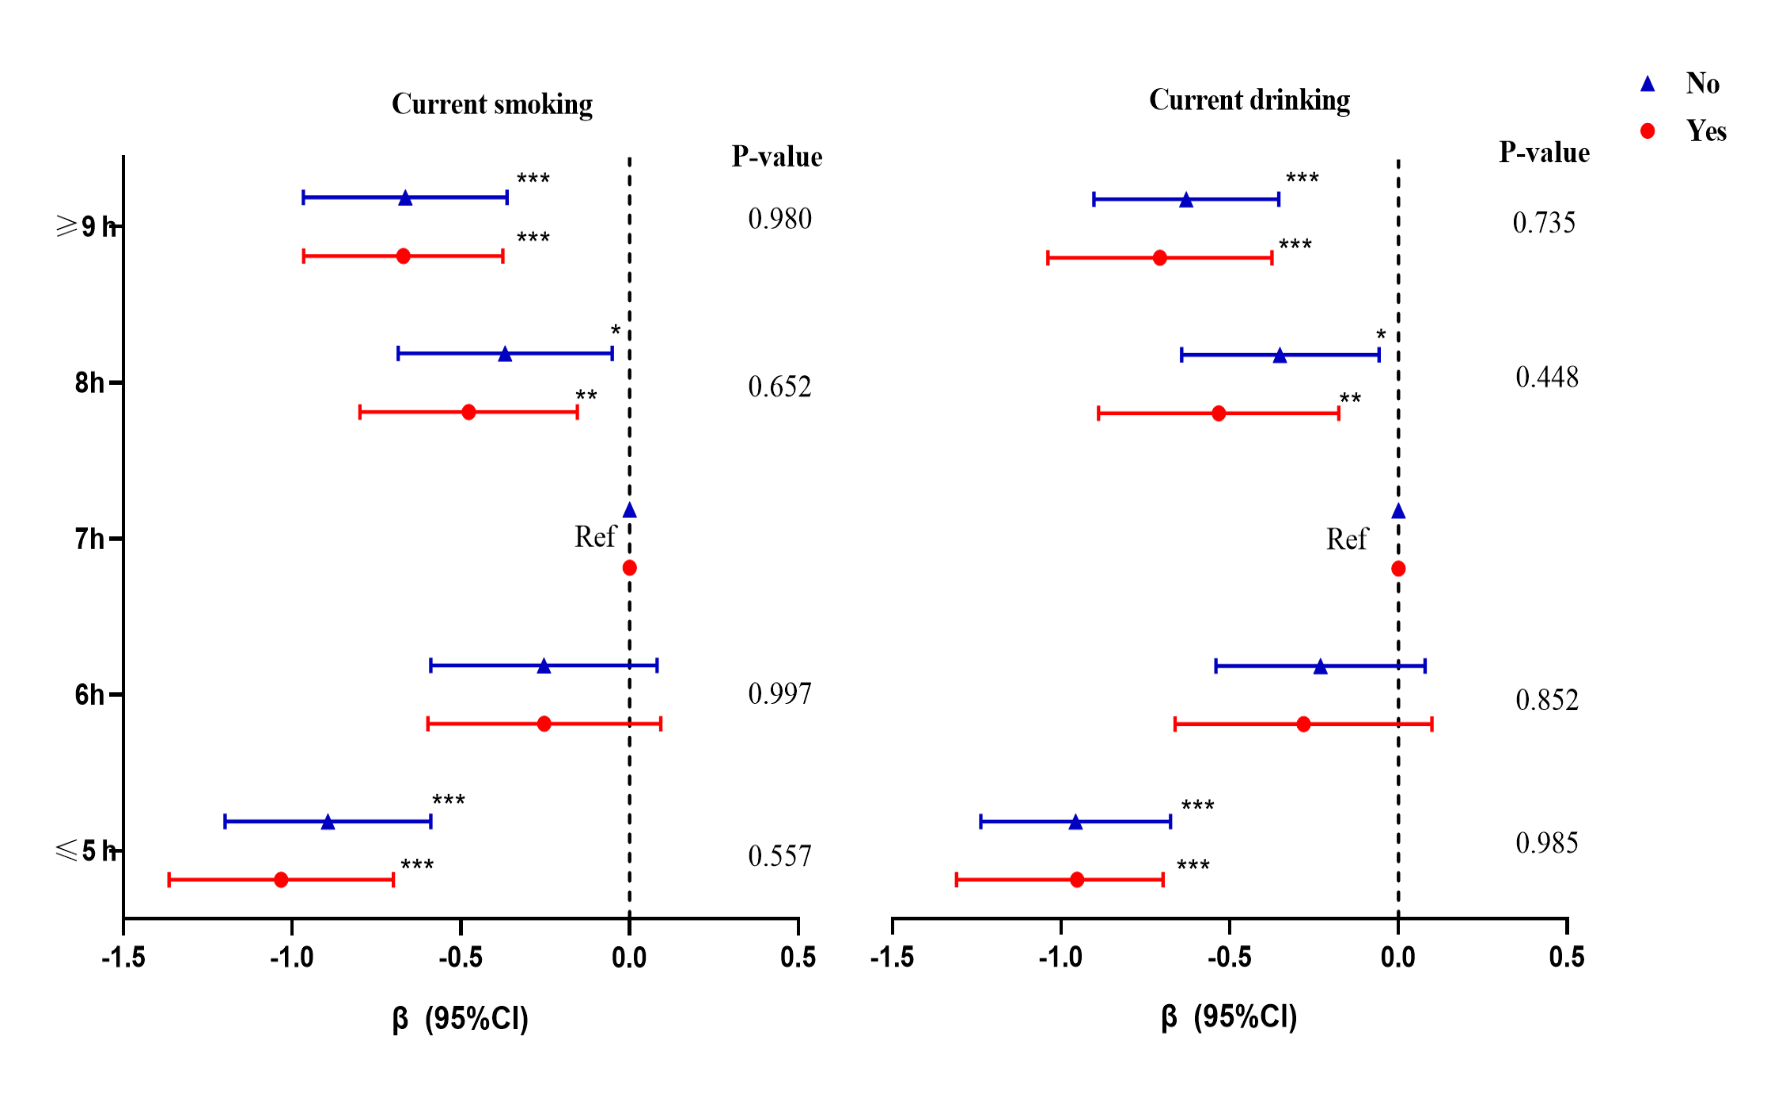


**Figure S2.** Association between total sleep duration and cognition function score stratified by current smoking and current drinking.

*P < 0.05, **P < 0.01, ***P < 0.001.
